# Supplementary material
Source: PubMed Central journal article supplement (PMC11260498)
Supplement: NIHMS2004754-supplement-Sup_fig.pdf [file NIHMS2004754-supplement-Sup_fig.pdf]

---

# Massively parallel knock-in engineering of human T cells

---

In the format provided by the authors and unedited

---

|    |                                                                |
|----|----------------------------------------------------------------|
| 1  | <b>Contents</b>                                                |
| 2  | <b>Supplementary Figs. 1-13</b>                                |
| 3  | <b>Supplementary Datasets S1-S6 legends</b>                    |
| 4  | <b>Table S1. Supplementary DNA oligonucleotide information</b> |
| 5  |                                                                |
| 6  | <b>Supplementary source data and statistics</b>                |
| 7  |                                                                |
| 8  |                                                                |
| 9  |                                                                |
| 10 |                                                                |
| 11 |                                                                |
| 12 |                                                                |
| 13 |                                                                |
| 14 |                                                                |
| 15 |                                                                |
| 16 |                                                                |
| 17 |                                                                |
| 18 |                                                                |
| 19 |                                                                |
| 20 |                                                                |
| 21 |                                                                |

# Supplementary Figure 1

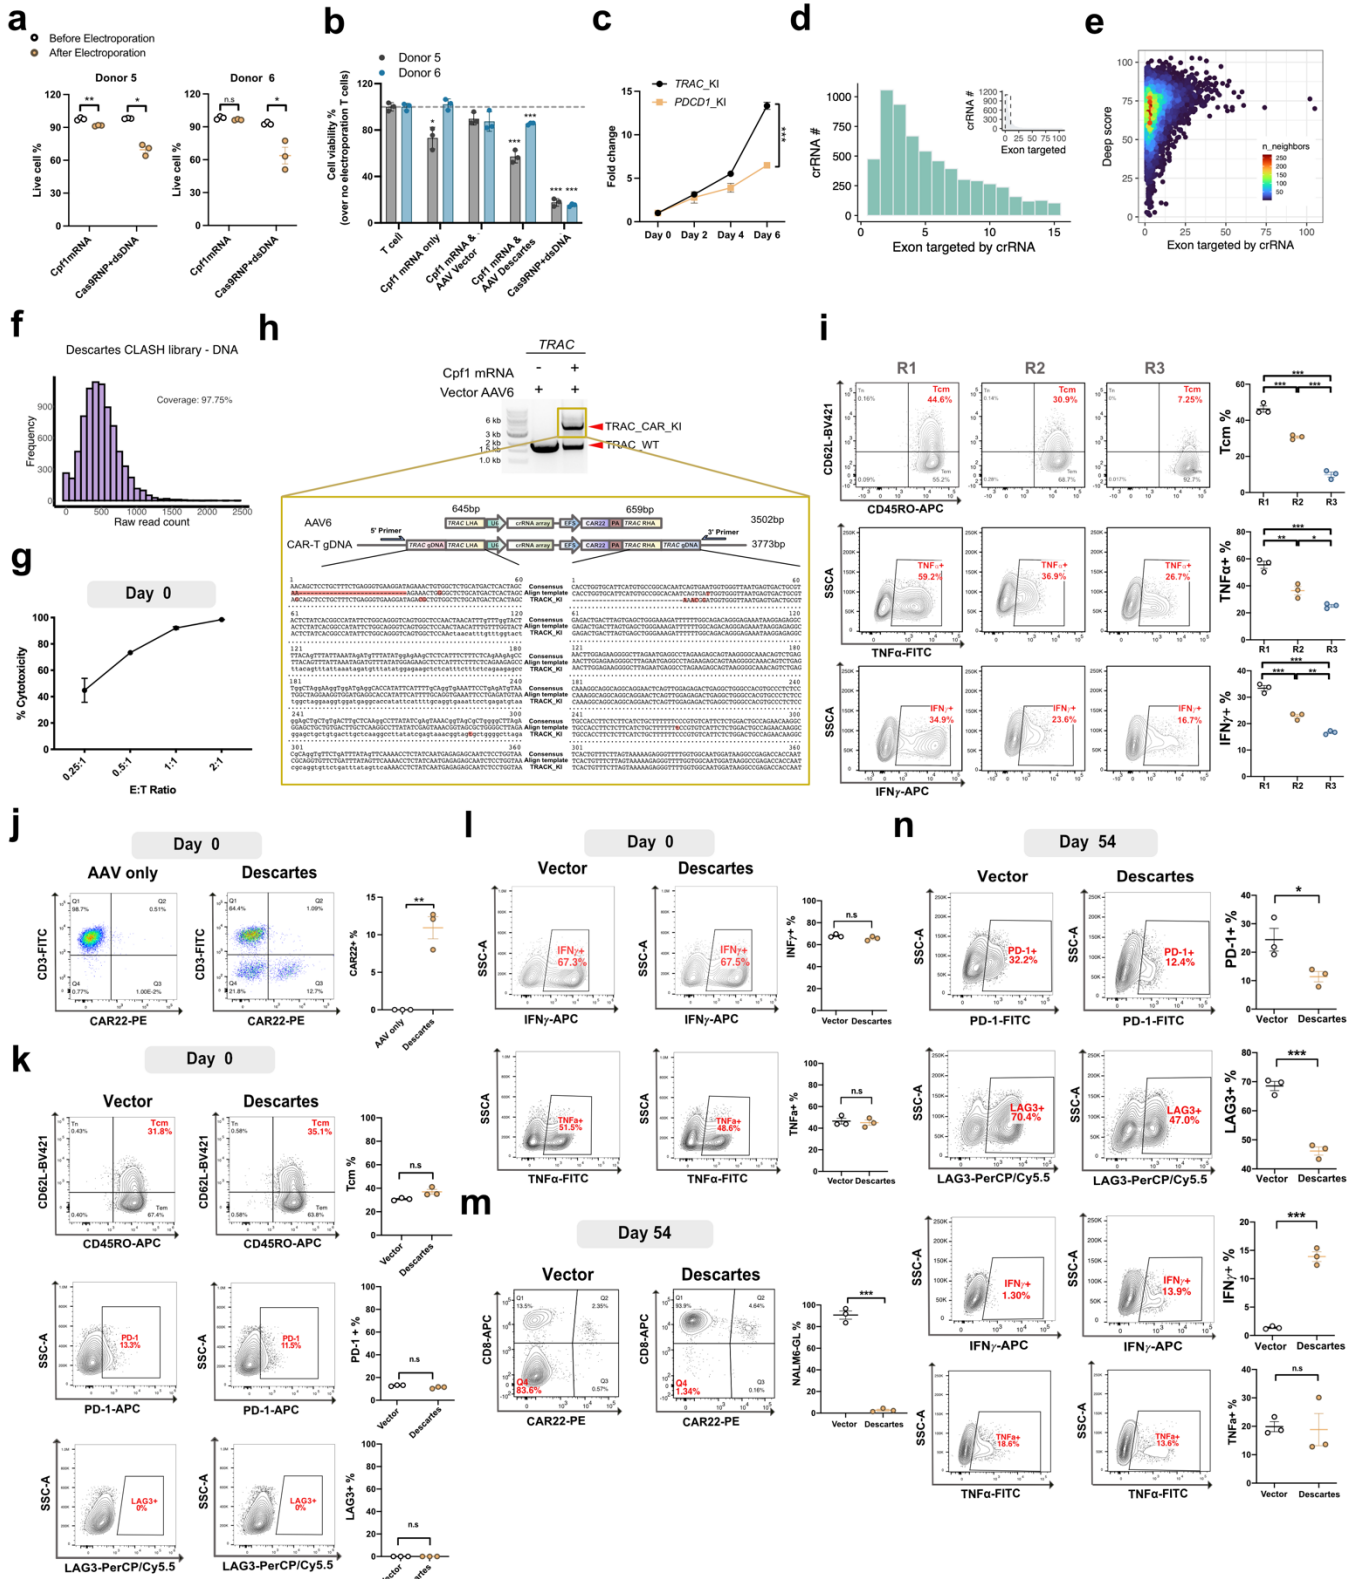

22

23 **Supplementary Figure 1: Establishment of long-term co-culture experimental conditions and the**  
 24 **CLASH system for massively parallel CAR-T engineering**

- 25 **a**, Live cell percentages before and after electroporation for 4 hours, where viability was determined by  
26 trypan blue staining. Unpaired two-sided T test was used to assess statistical significance. \*  $p < 0.05$  and  
27 n.s., not significant. Data are shown as mean  $\pm$  s.e.m (n = 3).
- 28 **b**, Estimation of cells lost after electroporation with Cpf1 mRNA, CLASH-vector, CLASH-Descartes and  
29 non-viral targeting editing method after electroporation 2 days. Unpaired two-sided T test was used to assess  
30 statistical significance. \*  $p < 0.05$  and \*\*\*  $p < 0.001$ . Data are shown as mean  $\pm$  s.e.m (n = 3).
- 31 **c**, Proliferation of CLASH-mediated *TRAC* KI and *PDCDI* KI CAR-T cells. Cells were counted every two  
32 days after electroporation (n = 3). Two-way ANOVA was used to assess significance, \*\*\*  $p < 0.001$ . Data  
33 are shown as mean  $\pm$  s.e.m.
- 34 **d**, Histogram summary of the gene exons targeted by Descartes Cpf1 crRNAs. Inset histogram shows  
35 crRNA targeting for all exons, while the main panel highlights targeting within the first 15 exons.
- 36 **e**, Density plot showing the exon targeting of Descartes Cpf1 crRNAs, relative to the predicted activity,  
37 based on DeepCpf1 scores. The density of points is calculated as the # of neighbor points and is represented  
38 by a heat map color-scale.
- 39 **f**, Histogram of crRNA representation by NGS sequencing of Descartes plasmid library.
- 40 **g**, Baseline cytotoxicity of vector control CAR-T cells by kill assay at day 0 in donor 2. In vitro cytotoxic  
41 activity of CAR-T cells was measured by bioluminescence assay at different E/T ratios, using NALM6-GL  
42 cells stably transduced with GFP and luciferase genes as target cells. Data are shown as mean  $\pm$  s.e.m.
- 43 **h**, Agarose DNA gel showing representative PCR reactions using primers at the *TRAC* locus (primers  
44 correspond to sequence outside the homology arms from the AAV donor). The upper band corresponds to  
45 sequences with transgene insertion. The detailed Sanger sequencing result was shown at right (misaligned  
46 DNA highlighted in pink). T cell genomic DNA was collected 5 days after electroporation. Represented  
47 data from four experiments.
- 48 **i**, (Left) Representative flow cytometry analysis of memory and cellular cytotoxic marker expression on  
49 CAR-T cells after repeated co-culture with NALM6 for 3 weeks. Naive T cells (Tn) were defined as  
50 CD45RO-CD62L+, effector memory T cells (Tem) as CD45RO+CD62L- and central memory T cell (Tcm)  
51 as CD45RO+CD62L+. (Right) Quantification of Tcm, TNF $\alpha$ + and IFN $\gamma$ + percentages in CAR-T cells  
52 (infection replicates, n = 3). Tukey's multiple comparison test was used to assess significance. \*  $p < 0.05$ ,  
53 \*\*  $p < 0.01$  and \*\*\*  $p < 0.001$ . Data are shown as mean  $\pm$  s.e.m.
- 54 **j**, (Left) Flow cytometry plots showing representative CAR22 knock-in into *TRAC* locus after CLASH  
55 Descartes library transduction for 5 days (AAV6 packaging, g-MOI =  $5 \times 10^3$ ). (Right) Quantification of  
56 CD3-CAR22+ percentages in each group (infection replicates, n = 3). Unpaired two-sided t test was used to  
57 assess significance. \*\*  $p < 0.01$ . Data are shown as mean  $\pm$  s.e.m.

58 **k-l**, Representative flow cytometry analysis and quantification of Tcm (**k**), exhaustion markers (**k**) and  
59 cytotoxic markers (**l**) in vector and Descartes-Lib CD22 CAR-Ts at day 0 (infection replicates, n = 3).  
60 Unpaired two-sided Mann Whitney test was used to assess significance. n.s, not significance. Data are  
61 shown as mean  $\pm$  s.e.m.

62 **m**. Representative flow cytometry analysis and quantification of NAML6 cancer cell percentages in both  
63 groups at CD8 *in vitro* CLASH screen day 54 (infection replicates, n = 3). Unpaired two-sided t test was  
64 used to assess significance. \*\*\* p < 0.001. Data are shown as mean  $\pm$  s.e.m.

65 **n**, Representative flow cytometry analysis and quantification of exhaustion markers and cytotoxic markers  
66 percentage in vector and Descartes-Lib CD22 CAR-Ts at day 54 (infection replicates, n = 3). One-way  
67 ANOVA with Tukey's multiple comparisons test was used to assess significance. \* p < 0.05, \*\* p < 0.01  
68 and \*\*\* p < 0.001. Data are shown as mean  $\pm$  s.e.m.

69

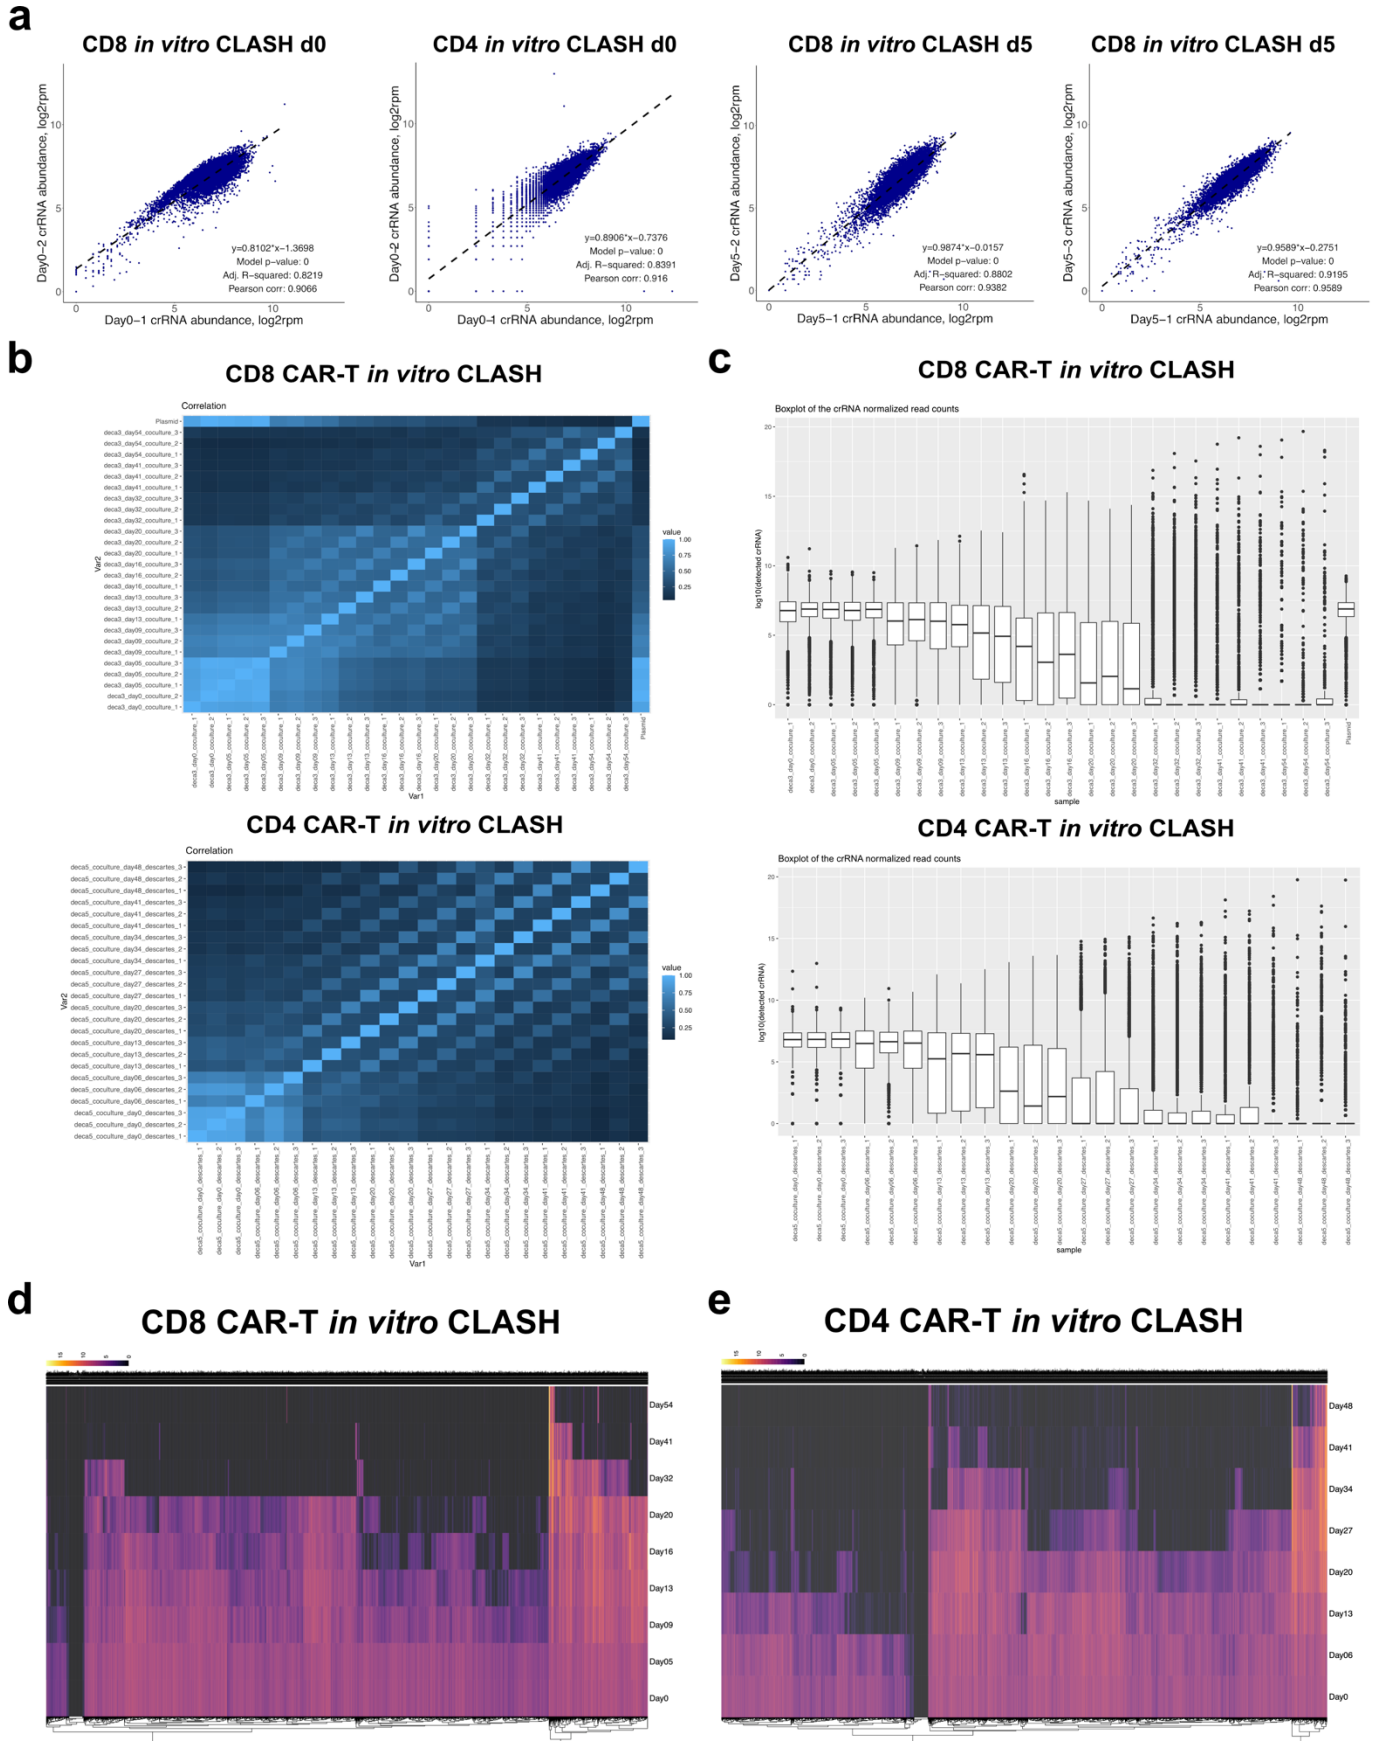

70  
71

Supplementary Figure 2: Library representation, correlation analysis and overall patterns of

72 **CLASH time course selection in CD4 and CD8 CAR-T cells**

73 **a**, Correlation plots of representative transduction replicates (day 0) and early time point (day 5) replicates.  
74 After total read normalization (to reads per million reads per sample; or rpm) and log<sub>2</sub> transformation,  
75 abundances for all crRNAs were compared between technical replicates 1 and 2 within each time point (in  
76 the following order from left to right: CD8 day0; CD4 day0; CD8 day5; CD4 day5). Using all points, a  
77 regression line was drawn, the p value of the model was calculated, and the Pearson correlation was  
78 determined.

79 **b**, Overall correlation analysis heatmaps of the crRNA representations in the genomic readouts of CD8 or  
80 CD4 *in vitro* CLASH knock-in CAR-T pools. Pearson correlations of crRNA library representation across  
81 time points were calculated based counts that were total read normalized (rpm) and log<sub>2</sub> transformed.

82 **c**, Box plots of the normalized read counts for all crRNAs at each time point in CD8 and CD4 *in vitro*  
83 CLASH experiments. Horizontal lines indicate the first quartile, median, and third quartile, with outlier  
84 crRNAs shown as black dots.

85 **d-e**, Overall landscape of CLASH time course massively parallel CD8 (**d**) or CD4 (**e**) CAR-T mutant variant  
86 selection in the long-term co-culture. Each column shows the total read normalized, log transformed  
87 abundance of a crRNA over time (y-axis), with colors indicating degree of abundance.

**a**

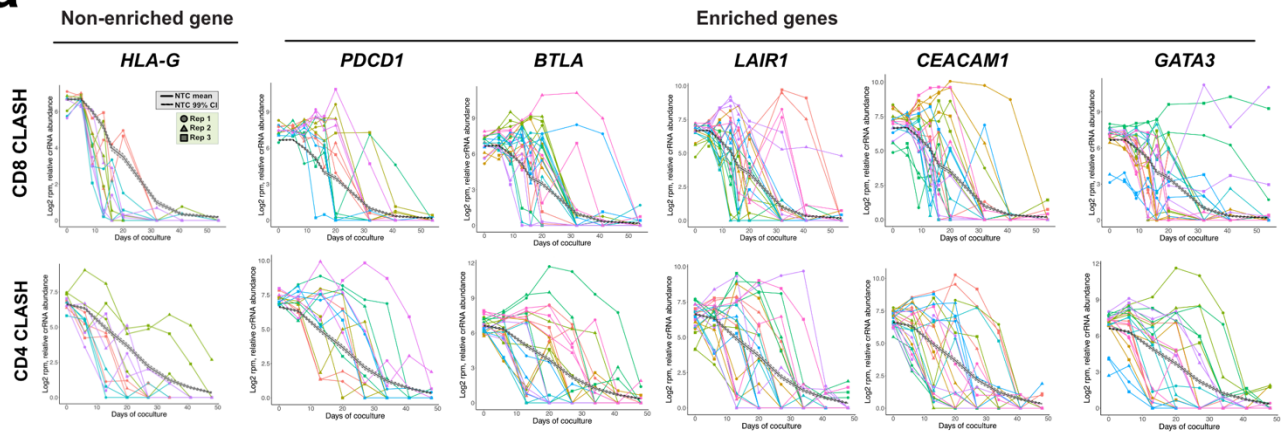

**b**

**CD8 CAR-T *in vitro* CLASH**

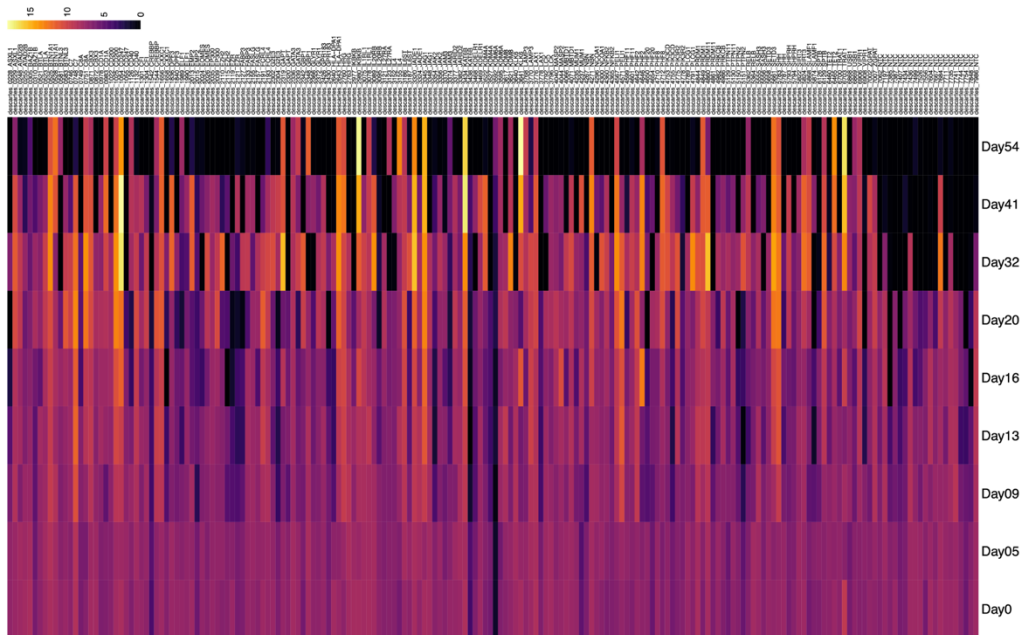

**CD4 CAR-T *in vitro* CLASH**

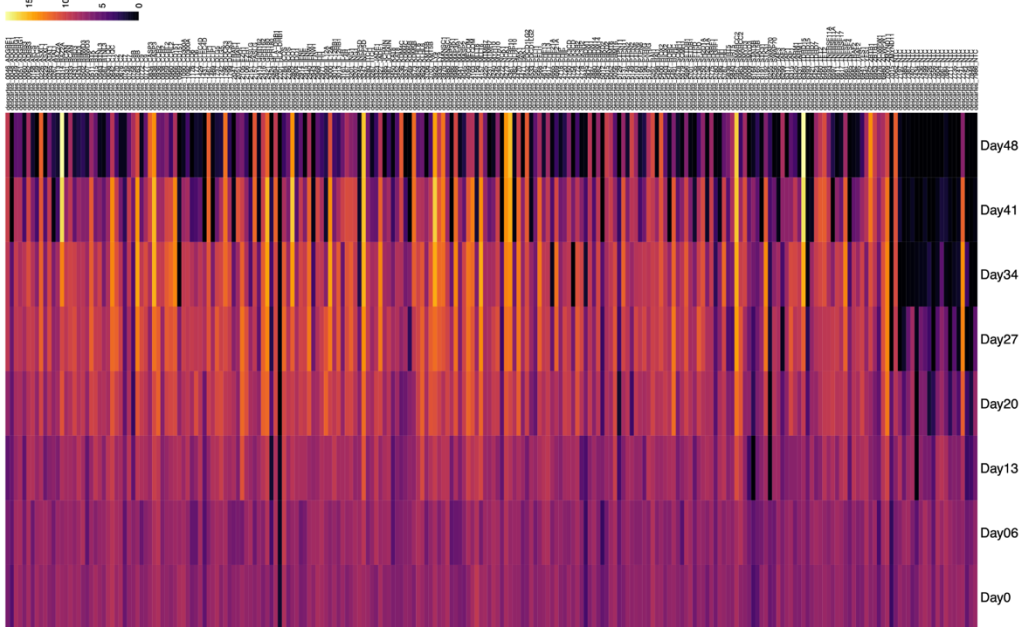



89 **Supplementary Figure 3: Time course behaviors of representative enriched genes and involved**  
 90 **biological pathways.**

91 **a**, Time-course analysis of crRNA abundance for representative enriched genes. Different point shapes  
 92 represent different replicates; different colors represent different crRNAs for the same gene. The dark solid  
 93 line represents the mean CLASH trajectory for the 1,000 NTC crRNAs, and the dark dashed lines represent upper  
 94 and lower 99% confidence intervals for NTCs.

95 **b**, Subset heatmap of log normalized crRNA representation over time. All the top 2 crRNAs of genes in  
 96 SAMBA analysis were shown ( $z > 1.5$  FDR= 0.01).

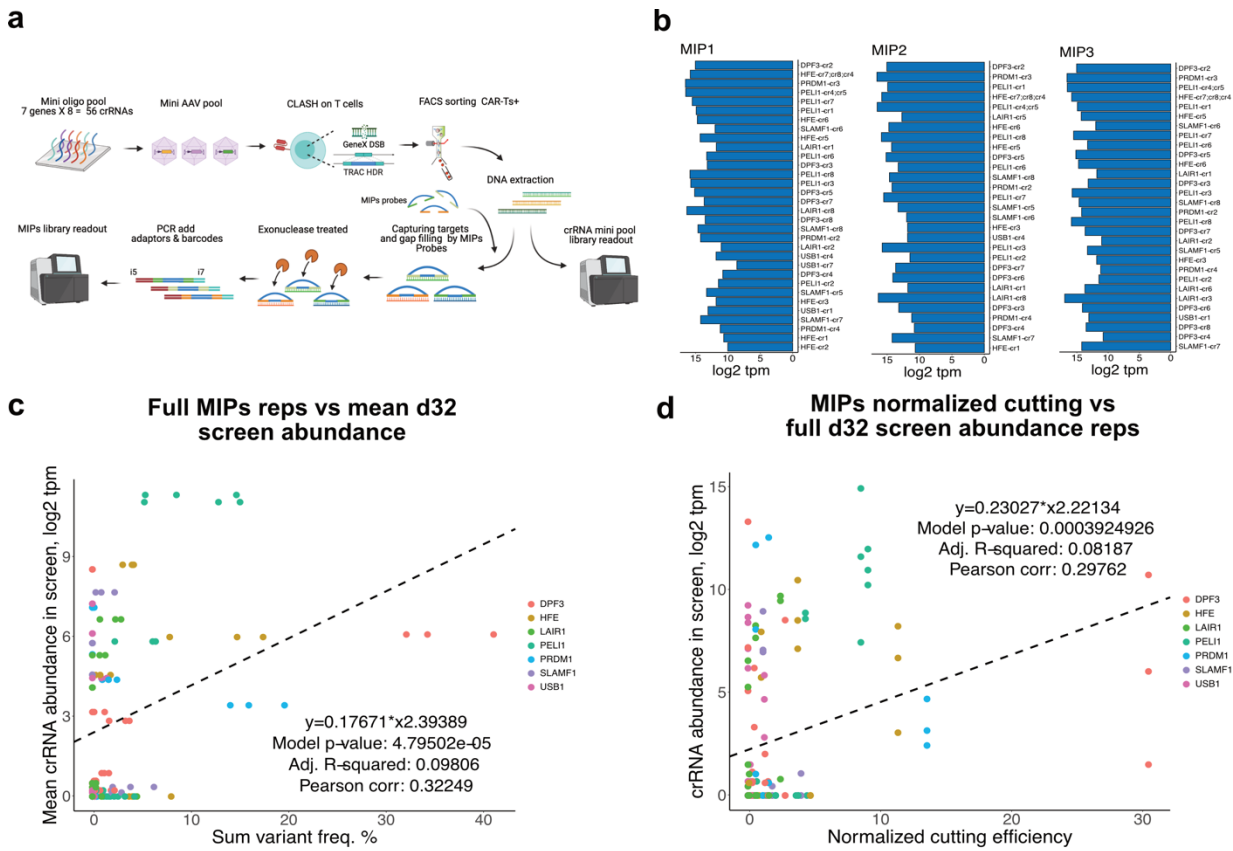

97 **Supplementary Figure 4: MIPS-CLASH joint analysis of correlation between editing efficiency of**  
 98 **CLASH performance in a pool setting**

100 **a**, Schematic of CLASH-MIPS experiment. A 56 crRNA mini pool was used for CLASH-MIPS. A minipool  
 101 of CAR-T cells was generated and subjected to FACS-based CAR-T enrichment 10 days after  
 102 electroporation. Genomic DNA from pooled genome edited CAR-Ts was used for two readouts: (1) target  
 103 capture / hybridization / MIPS, and (2) crRNA library readout.

104 **b**, Bar graph of crRNA library representation in MIPS samples by crRNA target windows.

105 **c**, Scatterplot of MIPS target-capture cutting efficiency for crRNA target windows by individual MIPS  
106 sample replicate compared to day 32 in vitro CLASH crRNA abundance averaged across replicates, for all  
107 genes. Linear regression model, statistics, and correlation analysis labelled.

108 **d**, Scatterplot of mean MIPS target-capture cutting efficiency for crRNA target windows normalized by  
109 mean MIPS crRNA abundance, compared to day 32 in vitro CLASH crRNA abundance by individual  
110 CLASH replicates, for all genes. Linear regression model, statistics, and correlation analysis are labelled.

111  
112  
113  
114  
115  
116  
117  
118  
119  
120

**a**

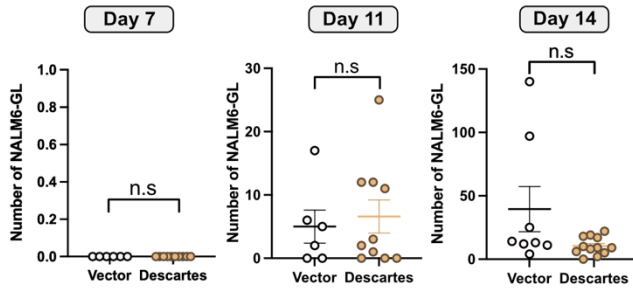

**b**

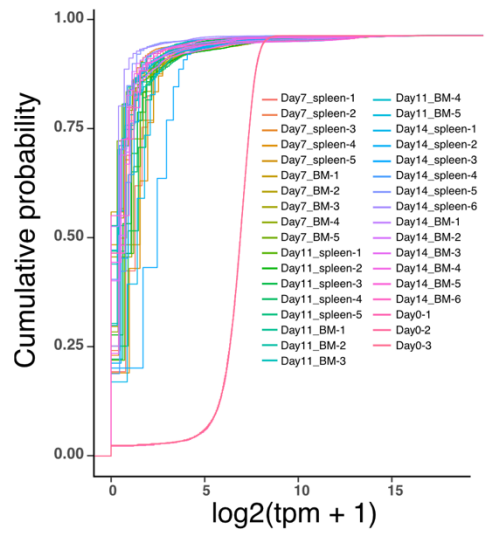

**c**

CD8 CAR-T *in vivo* CLASH

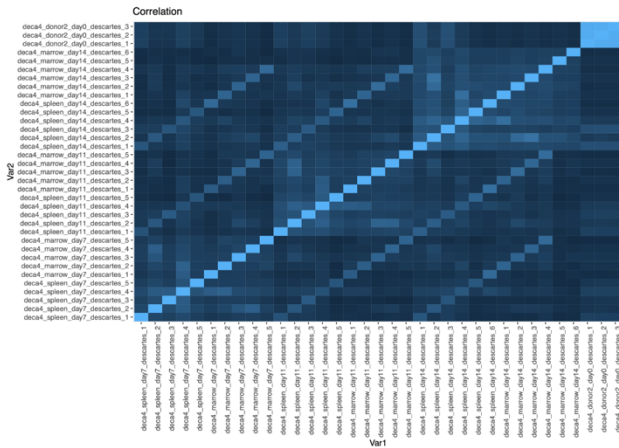

**d**

CD8 CAR-T *in vivo* CLASH

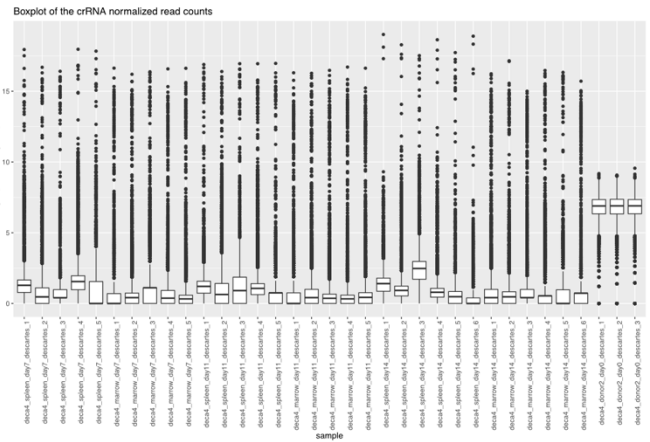

**e**

CD3 CAR-T solid tumor *in vivo* CLASH

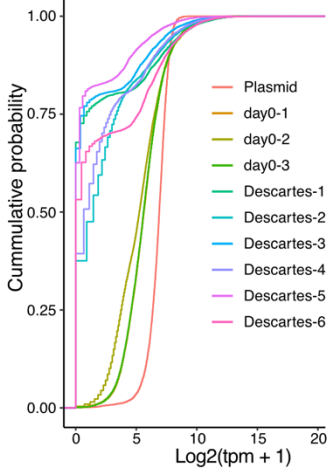

**f**

CD3 CAR-T solid tumor *in vivo* CLASH

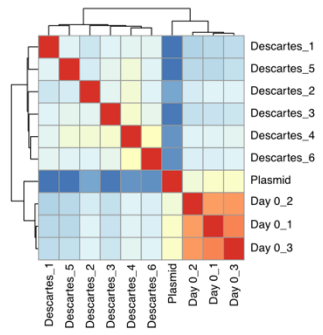

**g**

CD3 CAR-T solid tumor *in vivo* CLASH

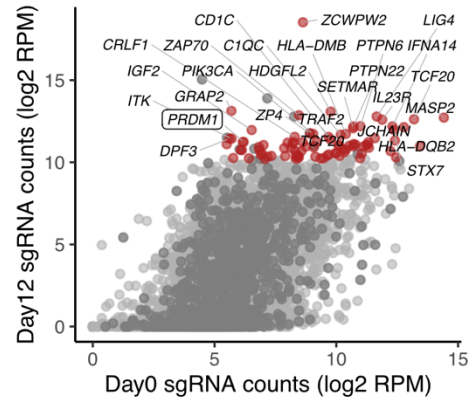

Descartes crRNA

- Non-targeting crRNA
- Non-significant crRNA
- 1% FDR crRNA

122 **Supplementary Figure 5: QC analysis of CAR-Ts *in vivo* CLASH**

123 **a**, Quantification of cancer cells at day 7, day 11 and day 14 (pooled spleen and bone marrow samples).  
124 Total tested live cells normalized to 1 million as inputs. Unpaired two-sided Mann Whitney test was used  
125 to assess significance. Day 7 (n = 5 mice; spleens and bone marrows, 10 samples total), day 11 (n = 5 mice,  
126 10 samples) and day 14 (n = 6, 12 samples). n.s., not significant. Data are shown as mean  $\pm$  s.e.m.

127 **b**, Empirical cumulative distribution function (CDF) of crRNA representations in the genomic readouts of  
128 CD8 *in vivo* CLASH CAR-T pool samples.

129 **c**, Correlation analysis of the crRNA representations in the genomic readouts of CD8 *in vivo* CLASH knock-  
130 in CAR-T pool. Pearson correlations of crRNA library representation across time points were calculated  
131 based counts that were total read normalized (rpm) and log<sub>2</sub> transformed.

132 **d**, Box plots of the normalized read counts for all crRNAs at each time point in CD8 *in vivo* CLASH.  
133 Horizontal lines indicate the first quartile, median, and third quartile, with outlier crRNAs shown as black  
134 dots.

135 **e**, Empirical CDF plot of crRNA representations of Descartes library in the genomic readouts of CD3 T  
136 solid tumor CLASH CAR-T pool samples.

137 **f**, Correlation analysis of the crRNA representations in the genomic readouts of CD3 T *in vivo* solid tumor  
138 CLASH knock-in CAR-T pool. Pearson correlations of crRNA library representation across time points  
139 were calculated based counts that were total read normalized (rpm) and log<sub>2</sub> transformed.

140 **g**, Bulk analysis of relative crRNA abundances in Descartes library in CD3 T solid tumor CLASH  
141 experiment at day 12 as compared with day 0 T cells. Gray dots are NTCs, red dots are scoring crRNAs  
142 that passed the FDR 1% cutoff, and light gray dots are remaining Descartes crRNA; top 25 crRNAs by log<sub>2</sub>  
143 rpm of the experimental condition (y axis) are labelled with corresponding gene names.

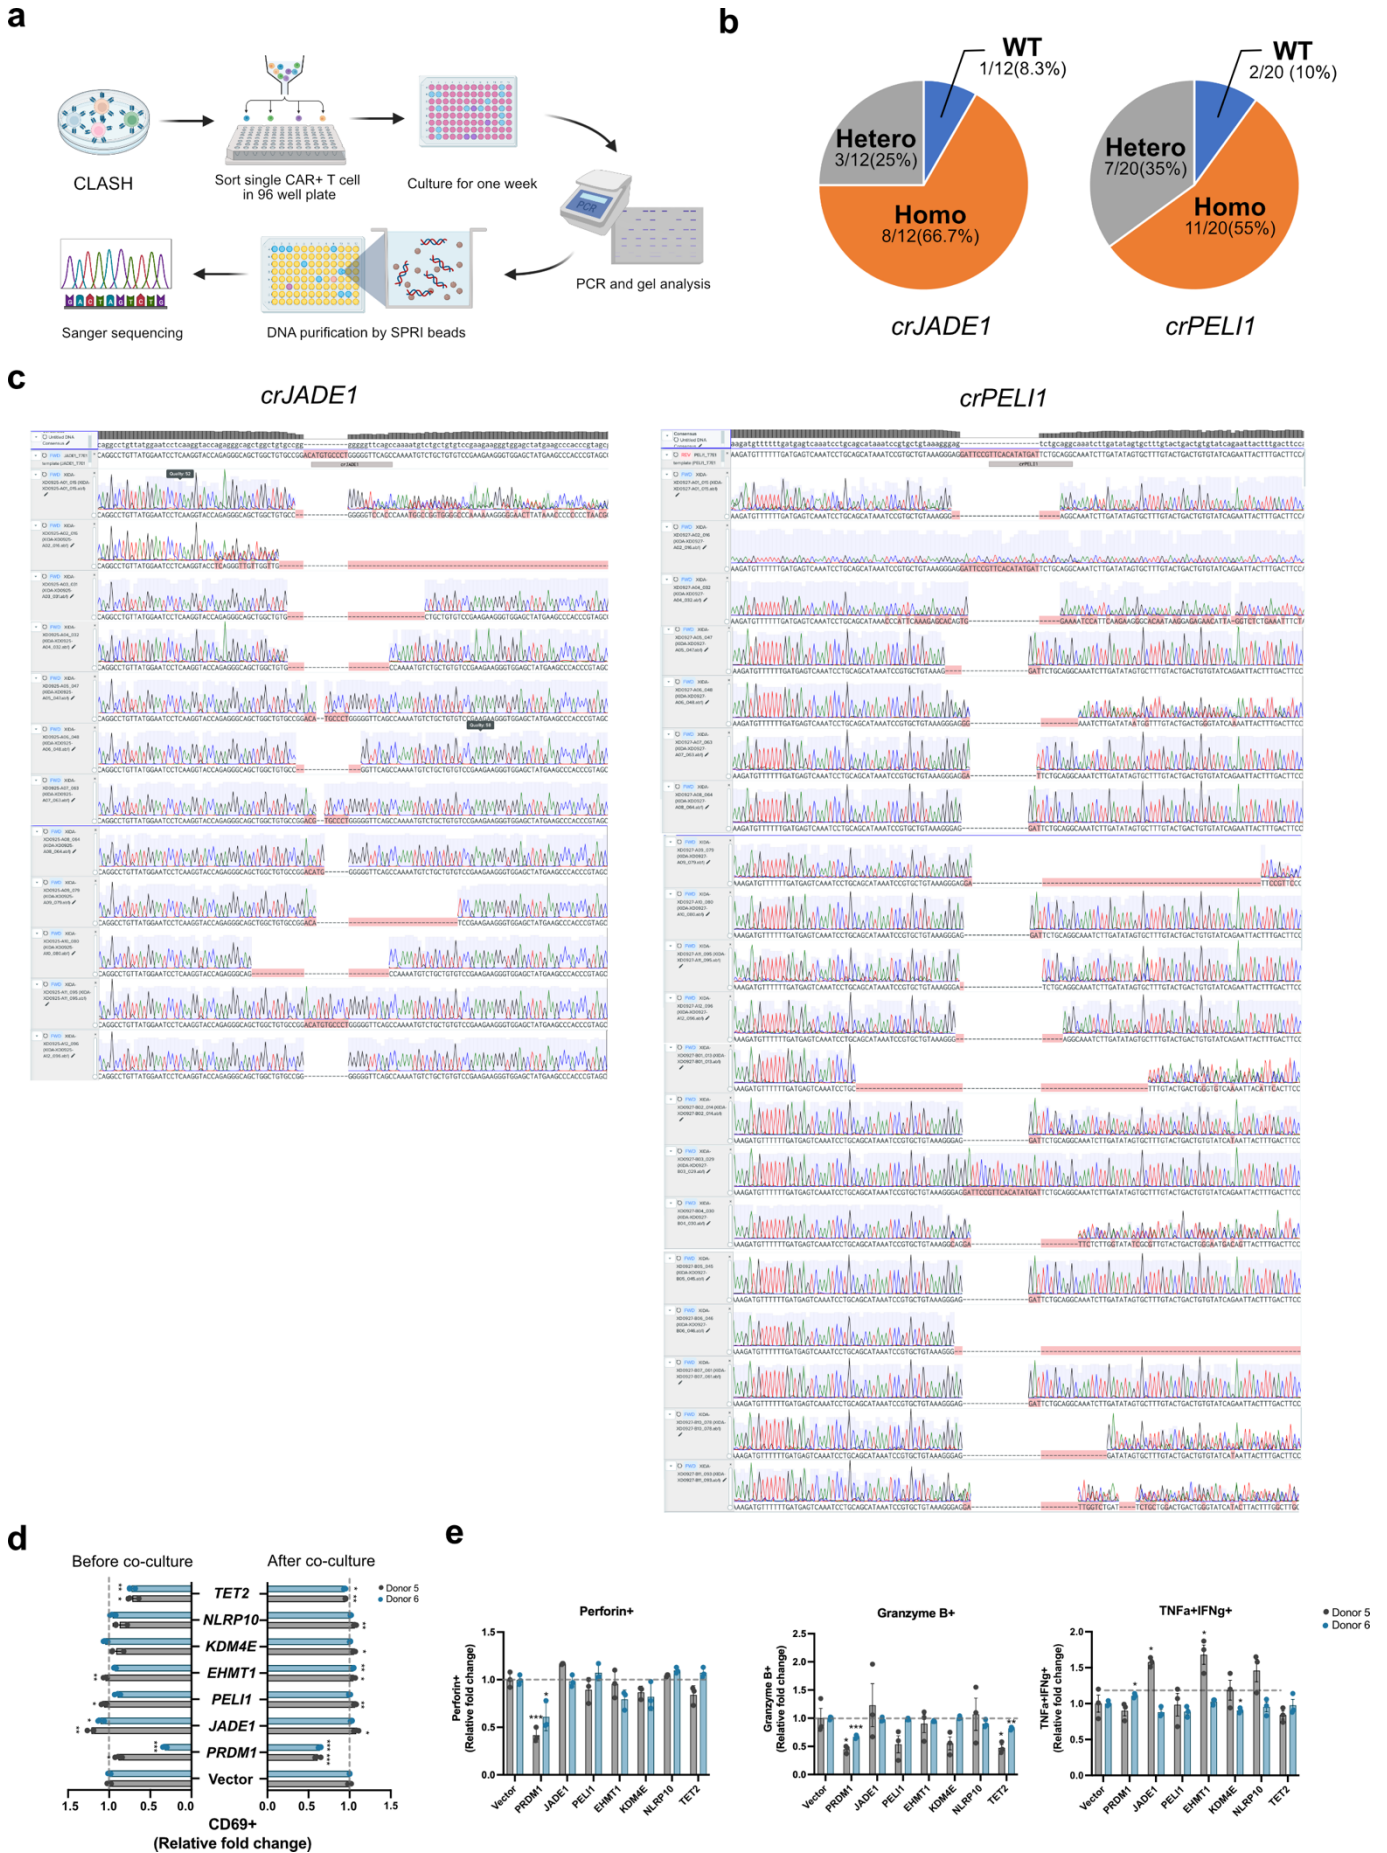

145 **Supplementary Figure 6: Single cell genotyping and additional individual functional analysis of**  
146 **immune genes scored in CLASH**

147 **a**, Schematic of CLASH single cell genotyping.

148 **b**, Pie chart showing percentage of wild type, homozygous and heterozygous/mixture single cell clone  
149 percentage (*crJADE1* n=12; *crPEL11* n=20).

150 **c**, Sanger sequencing results of *crJADE1* and *crPEL11* single clones.

151 **d**, Quantification of activation markers (CD69+) expressions in two different donors before co-culture or  
152 after co-culture with NALM6-GL for one day, normalized to vector control CAR-T cells. Unpaired two-  
153 sided t test was used to assess significance. \*  $p < 0.05$ , \*\*  $p < 0.01$  and \*\*\*  $p < 0.001$ . Data are shown as  
154 mean  $\pm$  s.e.m.

155 **e**, Quantification of cytotoxicity related markers (TNF $\alpha$ +IFN $\gamma$ +, perforin+ and Granzyme B+) expression  
156 in two different donors after co-culture with NALM6-GL for 5 hours, normalized to vector control CAR-T  
157 cells. Unpaired two-sided t test was used to assess significance. \*  $p < 0.05$ , \*\*  $p < 0.01$  and \*\*\*  $p < 0.001$ .  
158 Data are shown as mean  $\pm$  s.e.m.

**a**

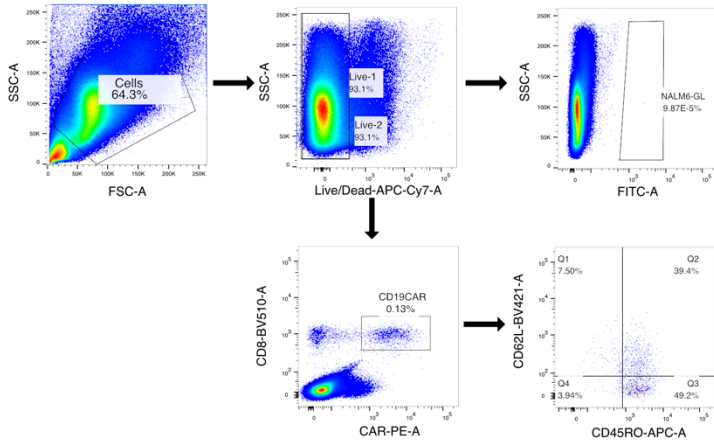

**b**

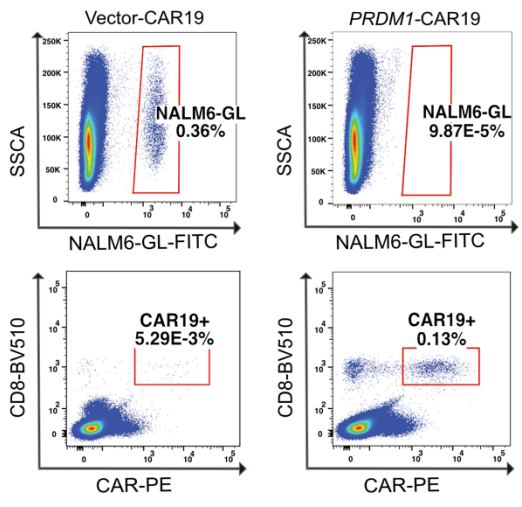

**c**

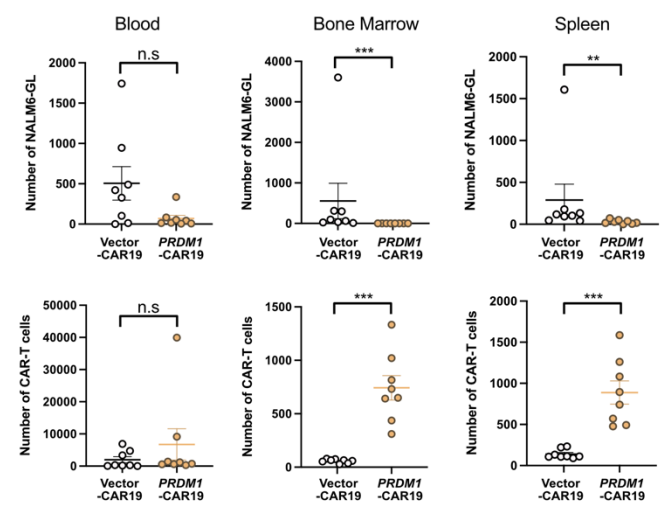

**d**

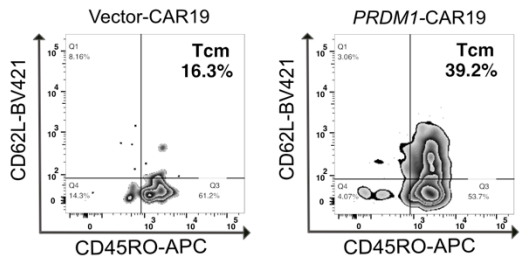

**e**

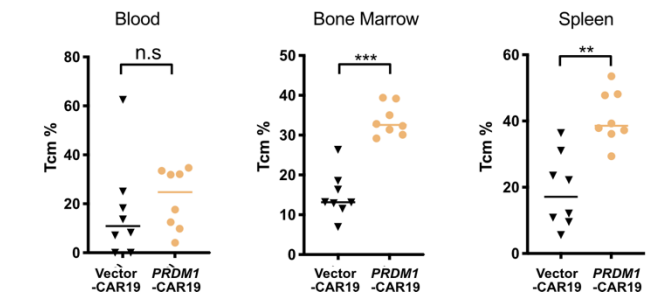

159

160

161

162

163

164

165

166

167

**Supplementary Figure 7: Flow cytometry analysis of PRDM1 Δexon3 CAR-T cells *in vivo***

**a.** Gating strategy used to delineate NALM6-GL (FITC<sup>+</sup>) and central memory CAR-T cells (CD8<sup>+</sup>CAR<sup>+</sup>CD45RO<sup>+</sup>CD62L<sup>+</sup>) in bone marrow.

**b,** Representative flow cytometry plots of NALM6-GL and CD19 Δexon3 CAR-T cells in bone marrow. NSG mice were euthanized at day 18. Vector CAR19 (n = 8) and PRDM1 Δexon3 CAR19 (n = 8).

**c,** Quantification of cancer cells and CAR-T cells in blood, bone marrow and spleen. Unpaired two-sided Mann Whitney test was used to assess significance. Total tested live cells normalized to 1 million as inputs. Vector CAR19 (n = 8) and PRDM1Δexon3 CAR19 (n = 8). \*\*\* p < 0.001. Data are shown as mean ± s.e.m.

168 **d**, Representative flow cytometry plots of CAR-T memory phenotype in bone marrow. NSG mice were  
169 euthanized at day 18. Vector-CAR19 (n = 8) and *PRDMI* $\Delta$ exon3 CAR19 (n = 8).  
170 **e**, Quantification of memory-like CAR-T (CD45RO<sup>+</sup>CD62L<sup>+</sup>) percentage in blood, bone marrow and  
171 spleen. Vector-CAR19 (n = 8) and *PRDMI* $\Delta$ exon3 CAR19 (n = 8). Unpaired two-sided Mann Whitney test  
172 was used to assess significance. \*\* p < 0.01, \*\*\* p < 0.001 and n.s., not significant. Data are shown as mean  
173  $\pm$  s.e.m.



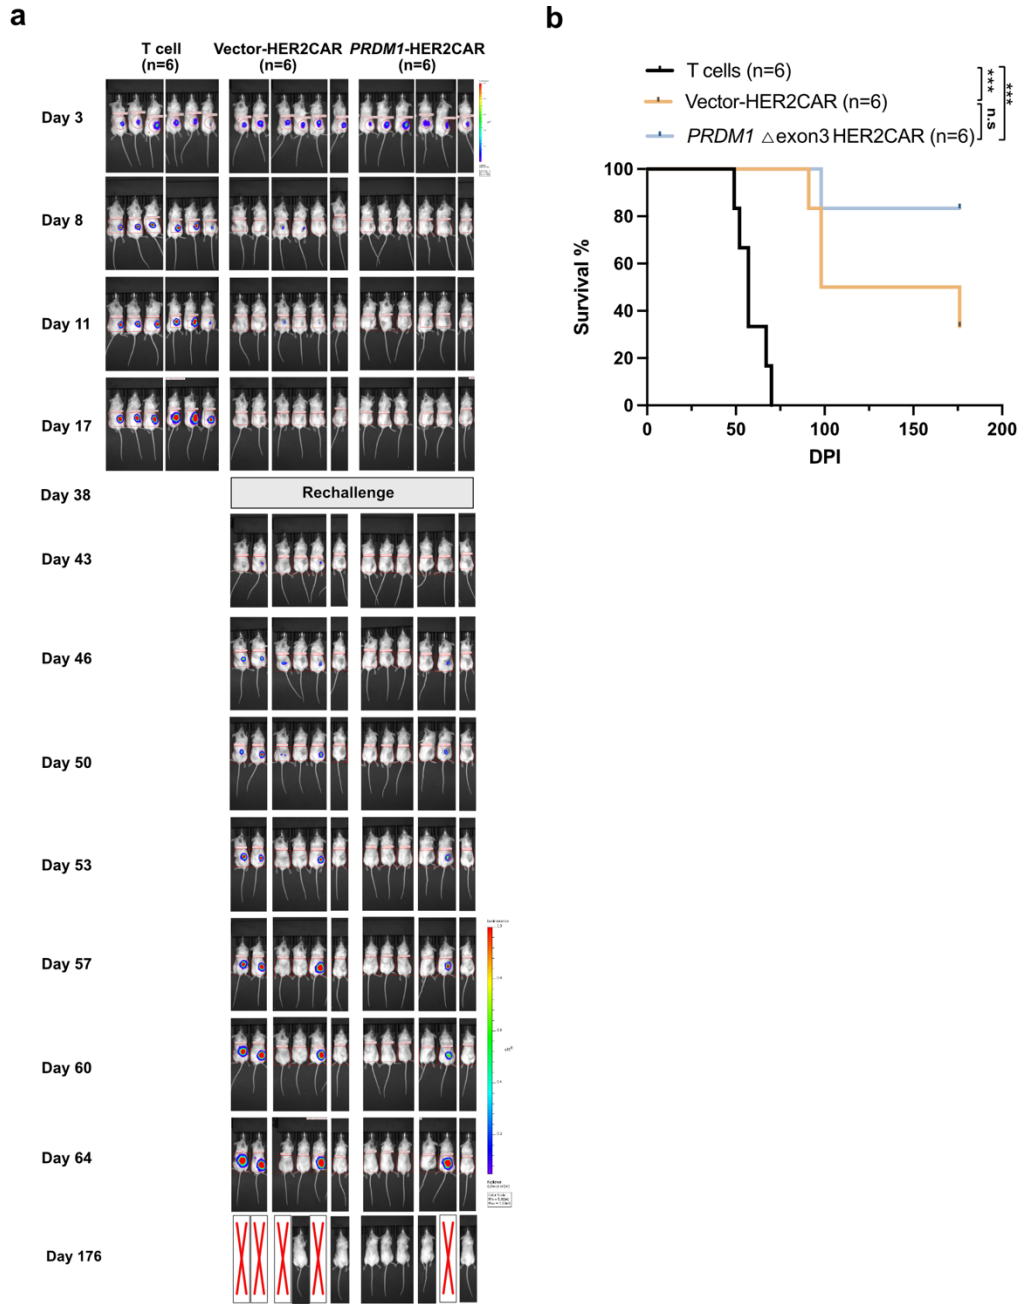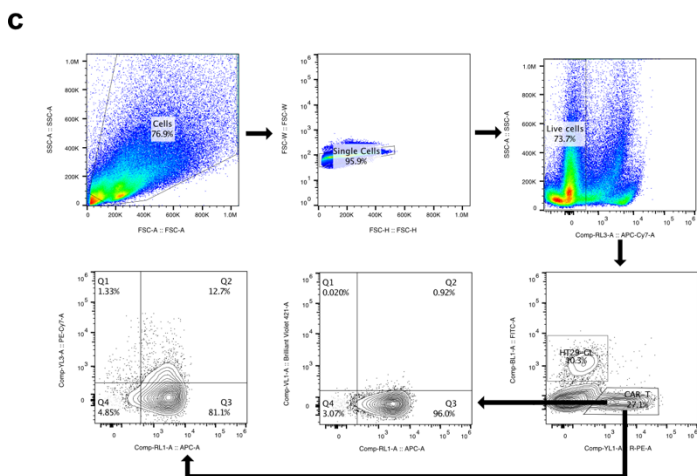

175 **Supplementary Figure 8: Bioluminescence imaging and survival analysis of HT29 rechallenge tumor**  
176 **model with *PRDM1*  $\Delta$ exon3 CAR-T cell adoptive transfer**

177 **a**, Bioluminescence imaging of HT29-GL-bearing NSG mice after treatment with vector or *PRDM1*  $\Delta$ exon3  
178 HER2 CAR-T cells. Cancer burden was measured as maximum photon per s per cm<sup>2</sup> per steradian (p per s  
179 per cm<sup>2</sup> per sr). Non-transduced CD3<sup>+</sup> T (n = 6), Vector HER2 CAR-T (n = 6) and  $\Delta$ exon3 HER2 CAR-T  
180 (n = 6). Red crosses indicated absence of imaging of particular animals that passed survival endpoints.

181 **b**, Kaplan-Meier survival curves of mice in the rechallenge tumor model with different T cell treatments.  
182 Non-transduced CD3<sup>+</sup> T (n = 6), Vector HER2 CAR-T (n = 6) and  $\Delta$ exon3 HER2 CAR-T (n = 6). Log-  
183 rank test was used to assess significance. \*\*\* p < 0.001 and n.s., not significant.

184 **c**, Gating strategy used to delineate HT29-GL (FITC+) and central memory CAR-T cells  
185 (CAR+CD45RO+CD62L+ or CAR+CD45RO+CCR7+) in solid tumor.

186 **d**, Representative flow cytometry plots of HT29-GL and  $\Delta$ exon3 Her2 CAR-T cells in bone marrow. NSG  
187 mice were euthanized at day 14. Vector CAR22 (n = 4) and *PRDM1*  $\Delta$ exon3 CAR22 (n = 5).

# Supplementary Figure 9

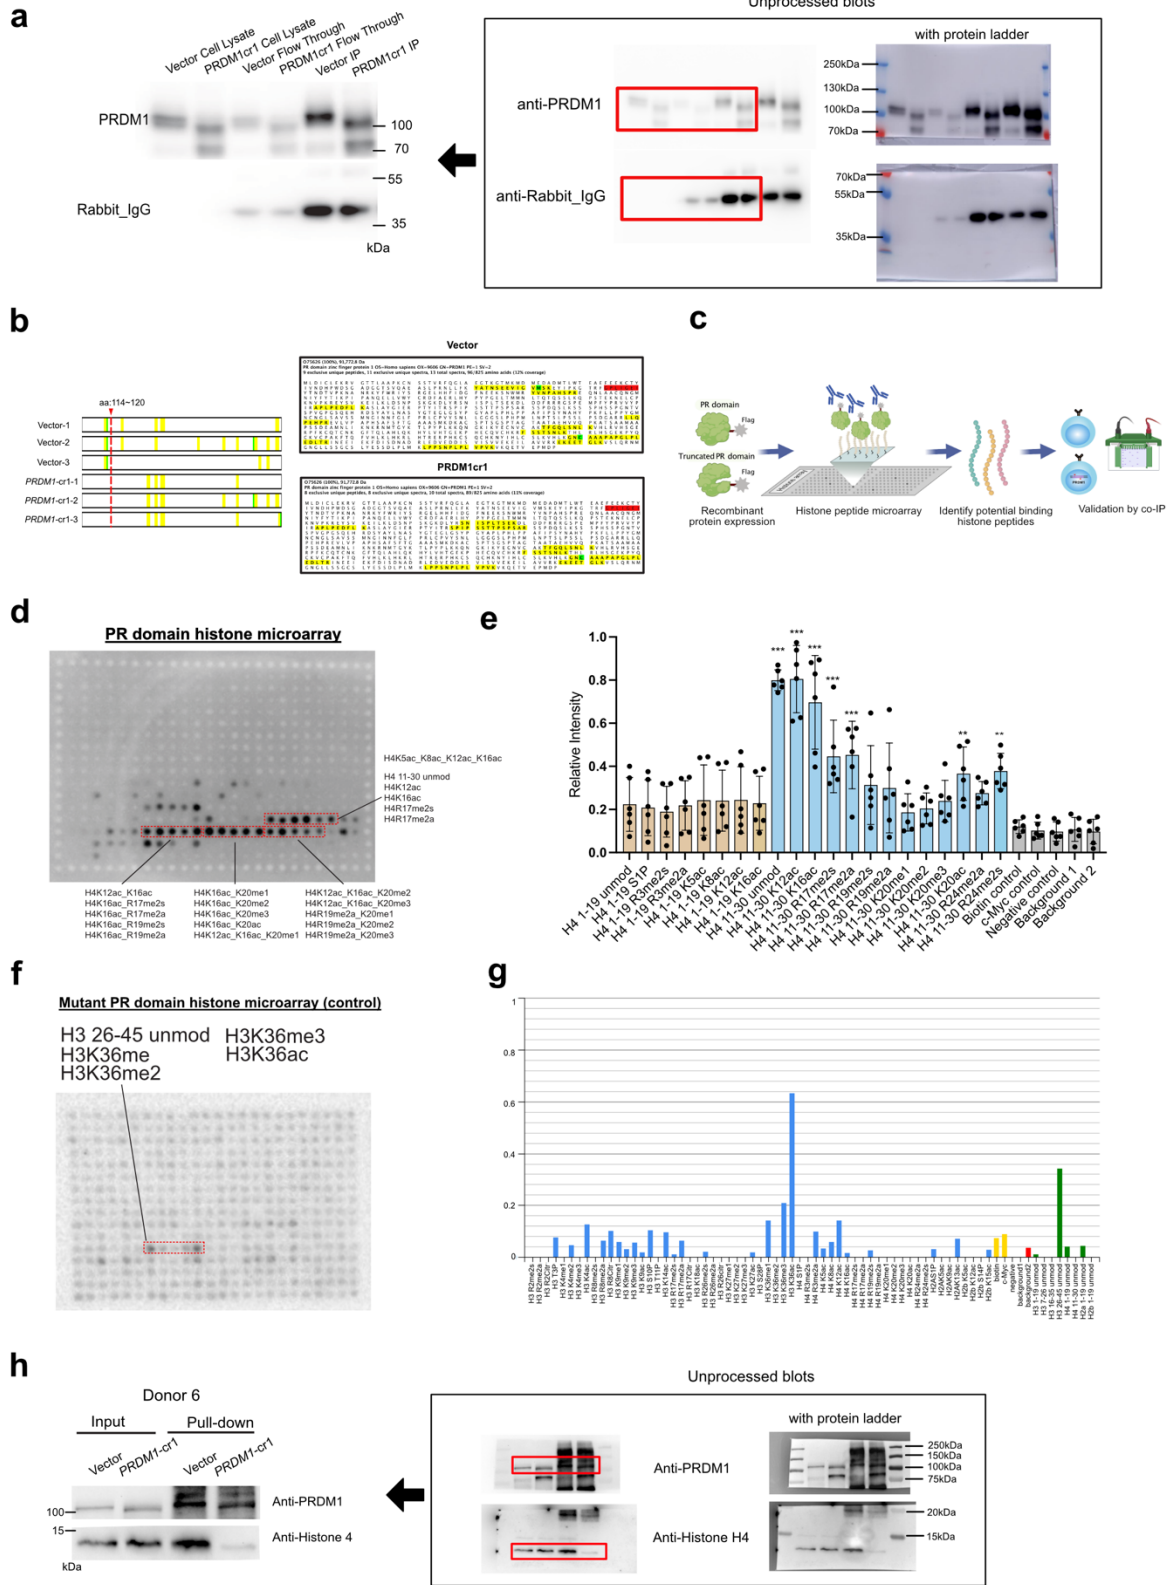

189 **Supplementary Figure 9: Proteomic and epigenetic characterization of *PRDM1*  $\Delta$ exon3 mutant**  
190 **CAR-T cells**

191 **a**, Immunoprecipitation (IP) and western blot analysis of CAR-T cells lysate after transduction with vector  
192 or *PRDM1*-cr1 AAV6 for 5 days. The gel image is a representative of three repeated experiments.

193 **b**, (Left) The schematics of mass spectrometry (MS) protein sequence coverage of IP-enriched PRDM1  
194 proteins in vector or *PRDM1* mutant CD22 CAR-T cells (detected peptides are highlighted in yellow, amino  
195 acids with post-translational modifications are shown in green and PRDM1 crRNA cutting sites are  
196 indicated by red dotted line). (Right) Representative MS protein sequence alignment of PRDM1 in vector  
197 or *PRDM1* mutant CD22 CAR-T cells (detected peptides are highlighted in yellow, amino acids with post-  
198 translational modifications are shown in green and *PRDM1* crRNA cutting sites are shown in red) (biological  
199 replicates, n = 3).

200 **c**, Schematic of histone peptide microarray and western blot validation by using purified PR domain and  
201 PR  $\Delta$ exon3 protein.

202 **d**, Representative image of histone peptide microarray. Histone peptide array probed with PR domain  
203 purified protein, followed by visualization with anti-FLAG antibody. Red boxed highlighted H4 11-30  
204 modified and unmodified peptides, with the corresponding peptide identification annotated aside.

205 **e**. Quantification of the PR domain binding specificity by Array Analyze Software. One-way ANOVA with  
206 multiple comparisons test was used to assess significance and all the sample mean was compared with the  
207 mean of background1. \*\* p < 0.01 and \*\*\* p < 0.001, Data are shown as mean  $\pm$  SD, n = 3 biological  
208 replicates, 6 samples.

209 **f**, Histone peptide array probed with PR  $\Delta$ exon3 purified protein, followed by visualization with anti-Flag  
210 antibody (control). Red boxed highlighted H4 11-30 modified and unmodified peptides, with the  
211 corresponding peptide identification annotated aside.

212 **g**. Analysis of the PR  $\Delta$ exon3 purified protein binding specificity by Array Analyze Software.

213 **h**, Co-IP Western using anti-PRDM1 and anti-histone H4 in vector control CAR-T and  $\Delta$ exon3 CAR-T  
214 cells in an independent donor. Represented data from three experiments.

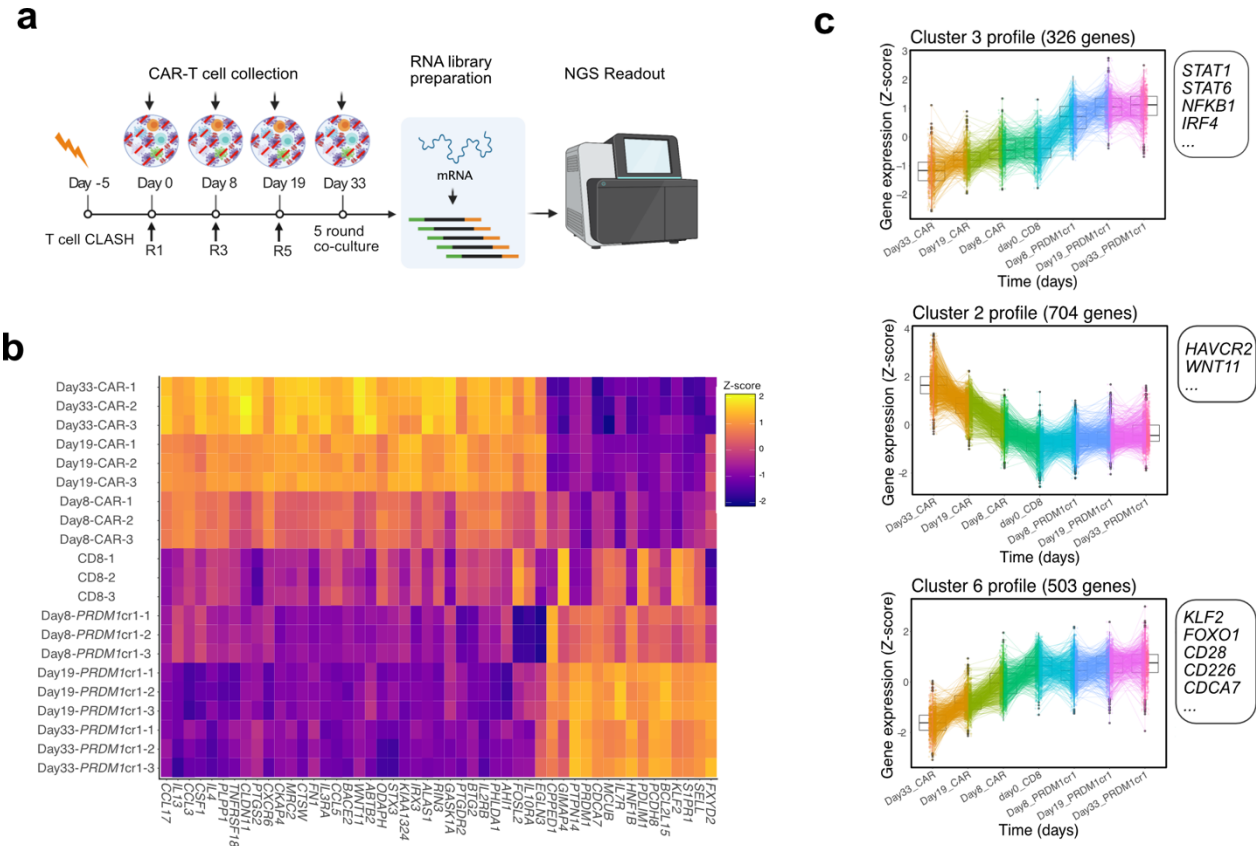

215

216 **Supplementary Figure 10: Time-course mRNA-seq of *PRDM1* Δexon3 mutant CAR-T cells**

217 **a**, Schematic of time-course mRNA-seq of CLASH-generated vector and *PRDM1* Δexon3 CD22 CAR-Ts.

218 **b**, Time-course mRNA-seq for CLASH-generated vector and *PRDM1* Δexon3 CD22 CAR-Ts. Heatmap of  
219 differentially expressed genes for *PRDM1* mutant vs control CAR-T cells across all 3 time points.

220 **c**, Gene clustering analysis of *PRDM1* Δexon3 CAR-T time-course mRNA-seq. Experiment-wide

221 expression profiles of 3 representative clusters from maSigPro time course cluster analysis. Clusters

222 comprise genes with similar expression patterns along time and similar behaviors between *PRDM1* Δexon3

223 vs control CAR-T groups. Representative genes in each cluster were highlighted.

# Supplementary Figure 11

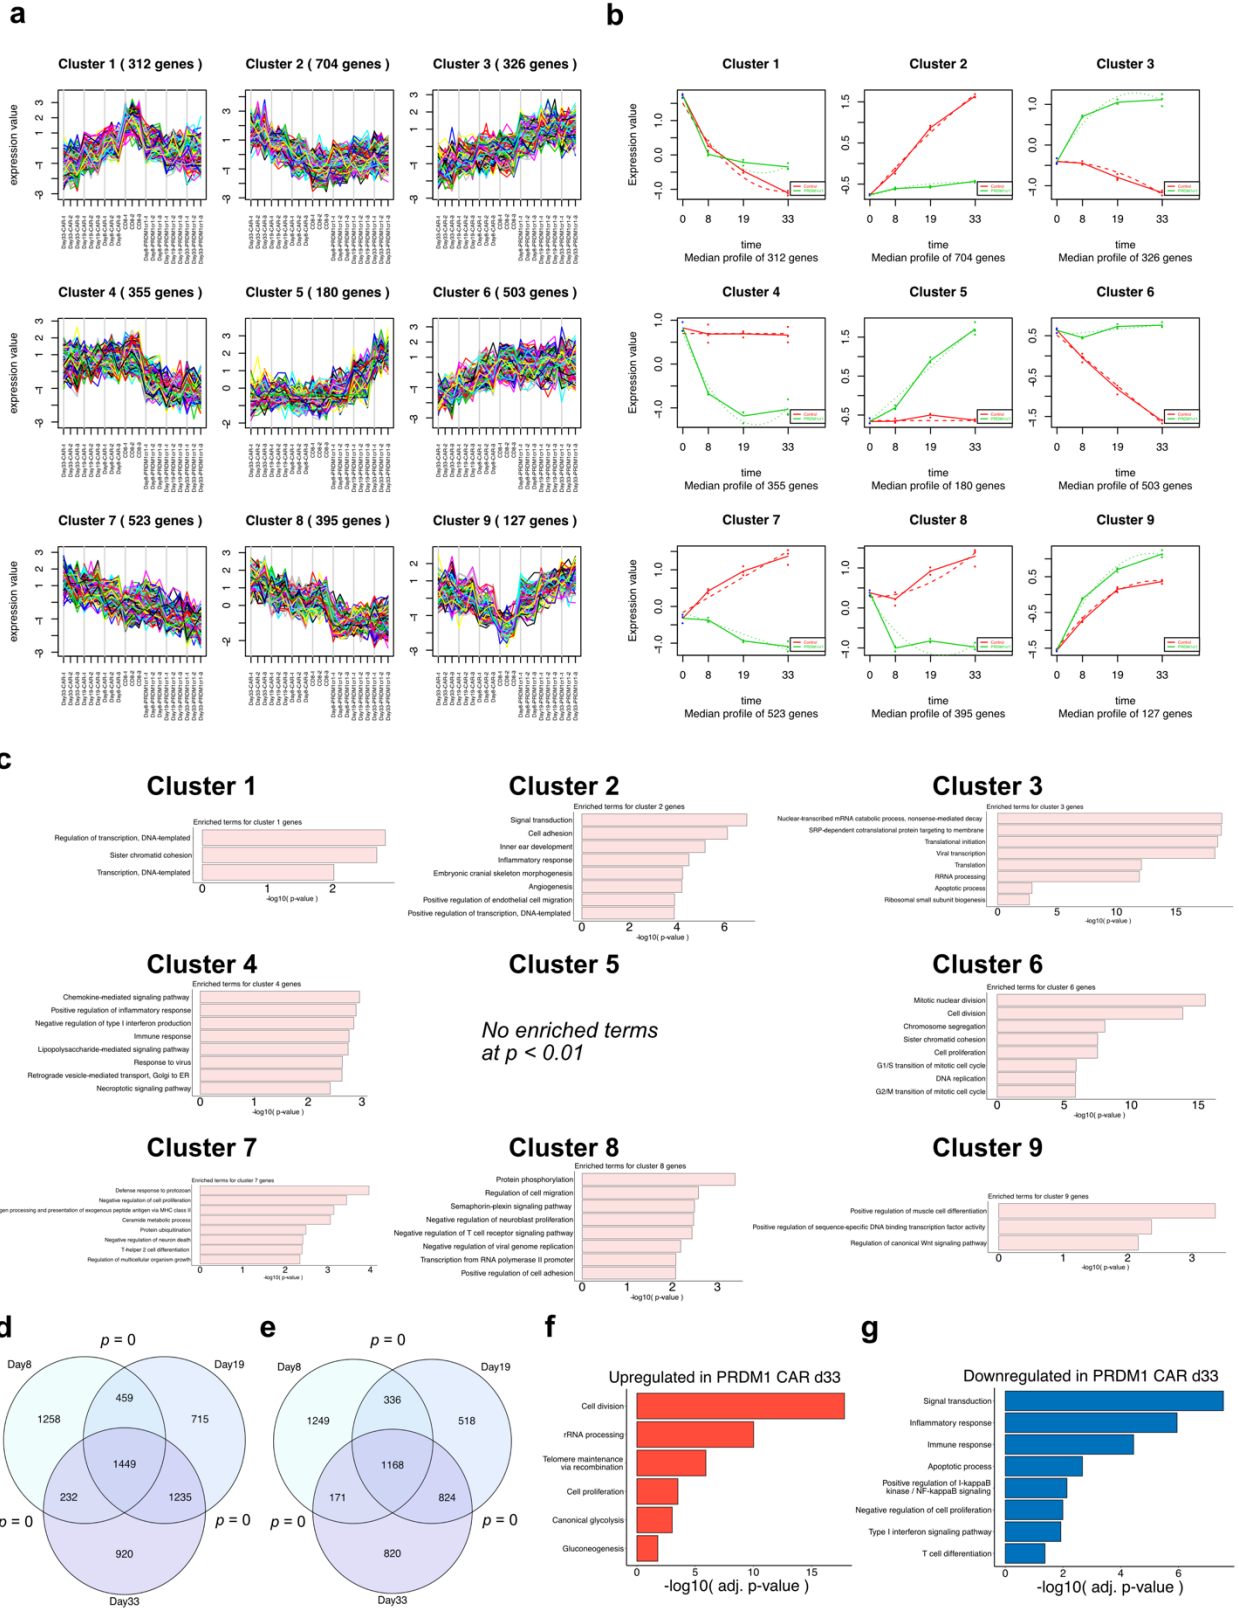

224

225

226

**Supplementary Figure 11: Analysis of gene expression clusters and their behaviors in *PRDM1* CAR-T time-course RNA-seq**

- 227 **a**, Full set of experiment-wide expression profiles from maSigPro time course cluster analysis of *PRDMI*  
228  $\Delta$ exon3 CAR-T time-course RNA-seq. Each cluster comprises of genes with similar expression patterns  
229 over time and also in regard to the behaviors of vector and  $\Delta$ exon3 CAR-T groups.
- 230 **b**, Experiment-wide gene expression profiles for each cluster represented with time-factor is in the x-axis,  
231 gene expression Z-score in the y-axis, and expression levels for a given experimental group represented by  
232 the same color. Solid lines join averages of each time group, dashed lines represent the regression curve.
- 233 **c**, Enriched gene ontology pathways found by DAVID analysis on gene sets of each of the 9 clusters.
- 234 **d**, Venn diagram of differentially upregulated genes found for  $\Delta$ exon3 vs control CAR-Ts. Two-sided  
235 hypergeometric test was used to assess significance. p-value threshold  $< 1e-3$  at three different time points.
- 236 **e**, Venn diagram of differentially downregulated genes found for  $\Delta$ exon3 vs control CAR-Ts. Two-sided  
237 hypergeometric test was used to assess significance. p-value threshold  $< 1e-3$  at three different time points.
- 238 **f**, Enriched gene ontology pathways found by DAVID analysis adjusted by Benjamini-Hochberg procedure  
239 on differentially upregulated genes for  $\Delta$ exon3 vs control CAR-Ts at adjusted p-value threshold  $< 1e-3$  on  
240 day 33.
- 241 **g**, Enriched gene ontology pathways found by DAVID analysis adjusted by Benjamini-Hochberg procedure  
242 on differentially downregulated genes for  $\Delta$ exon3 vs control CAR-Ts at adjusted p-value threshold  $< 1e-3$   
243 on day 33.

**a**

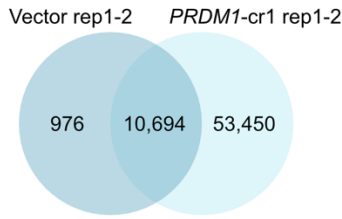

**b**

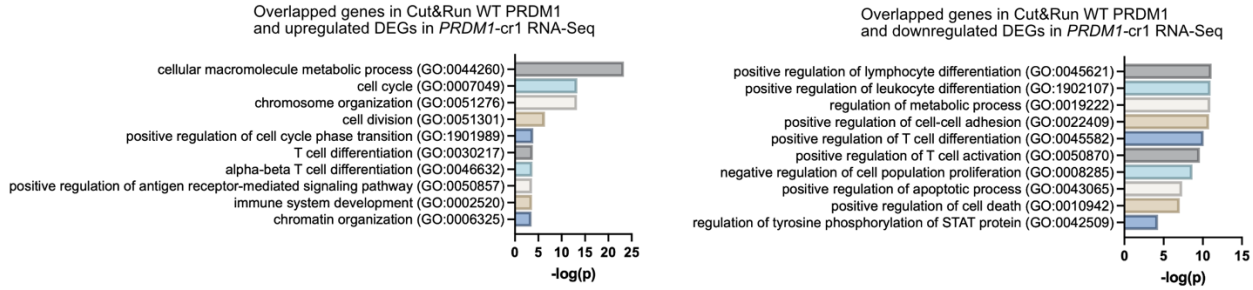

**c**

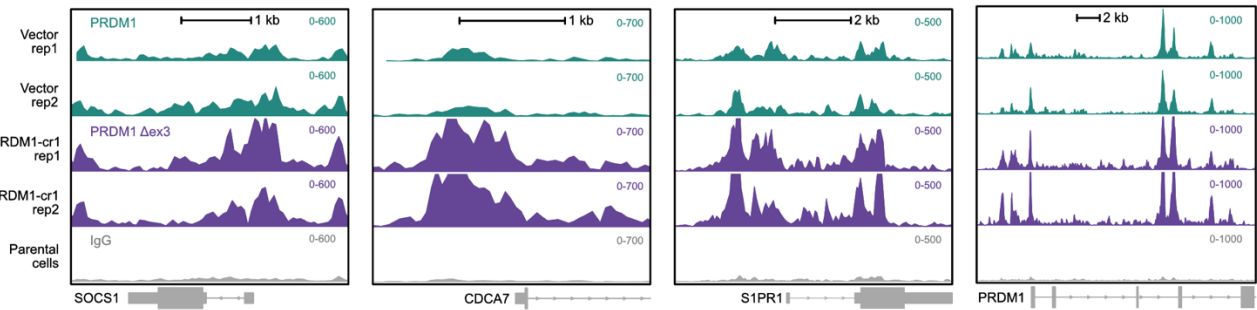

**d**

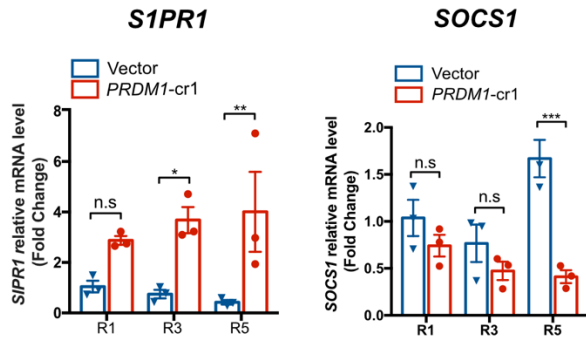

**e**

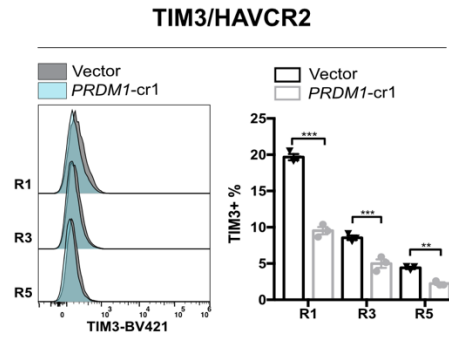

**f**

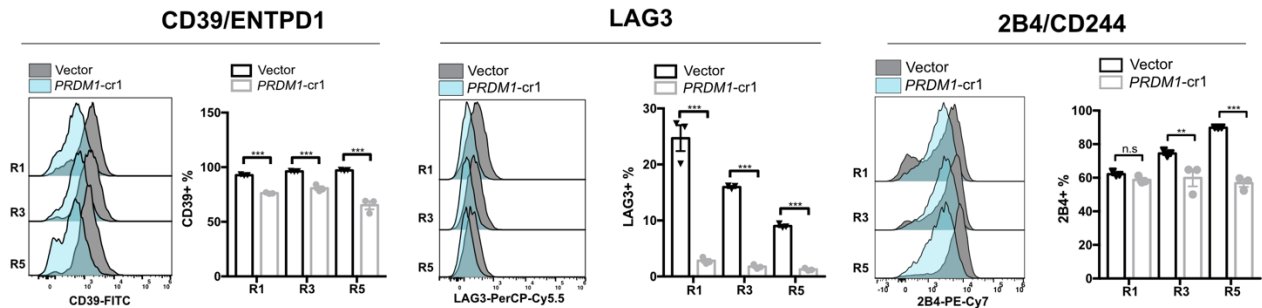

244

245

246

Supplementary Figure 12: Interrogation of direct targets and immunological mechanisms in CLASH generated *PRDM1*  $\Delta$ exon3 CAR-T cells



247 **a**, Venn diagram showing relationship between the WT PRDM1 and PRDM1  $\Delta$ exon3 Cut & Run peaks.  
248 **b**, Enriched gene ontology pathways found by GO website on overlapped genes between PRDM1 WT /  
249 PRDM1  $\Delta$ exon3 mutant protein bound genes with DEGs from day 33 *PRDM1*<sup>cr1</sup>  $\Delta$ exon3 mutant vs control  
250 CAR-T with Adjusted p-value threshold  $< 1e-4$ . Mann-Whitney U test was used to assess significance.  
251 **c**, Genome browser view of Cut & Run signal on a segment of *SOCS1*, *CDCA7*, *SIPRI* and *PRDM1*. Vector  
252 (WT PRDM1, two replicates), PRDM1  $\Delta$ exon3 (two replicates) and averaged IgG control.  
253 **d**, RT-qPCR analysis of *SIPRI* and *SOCS1* mRNA expression levels on vector and *PRDM1*  $\Delta$ exon3 CAR-  
254 T cells at 1<sup>st</sup>, 3<sup>rd</sup> and 5<sup>th</sup> round co-culture with NALM6 cells (infection replicates, n = 3). Two-way ANOVA  
255 with Sidak's multiple comparisons test was used to assess significance. \* p < 0.05, \*\* p < 0.01 and \*\*\* p <  
256 0.001. Data are shown as mean  $\pm$  s.e.m.  
257 **e-f**, Representative flow cytometry analysis of a panel of T cell exhaustion-related cell surface markers  
258 including TIM3/HAVCR2, CD39, LAG3 and 2B4/CD244 on vector and *PRDM1*  $\Delta$ exon3 CAR-T cells at  
259 1<sup>st</sup>, 3<sup>rd</sup> and 5<sup>th</sup> rounds of co-culture with NALM6 cells (infection replicates, n = 3). Two-way ANOVA with  
260 Sidak's multiple comparisons test was used to assess significance. \* p < 0.05, \*\* p < 0.01 and \*\*\* p < 0.001.  
261 Data are shown as mean  $\pm$  s.e.m.

262

263

#### 264 **Supplemental Figure Prep Note:**

265 Supplemental Figure 4a, 6a, 9c, 10 were created with BioRender.com.

266

**a**

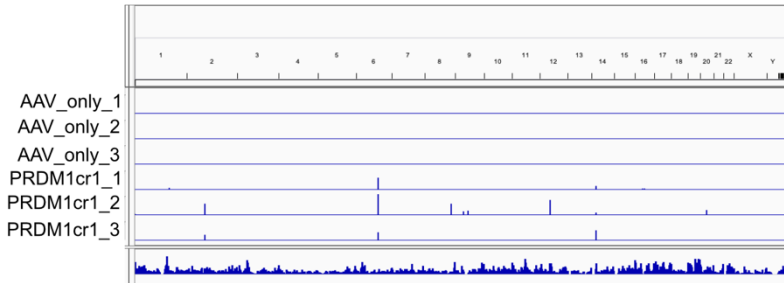

**b**

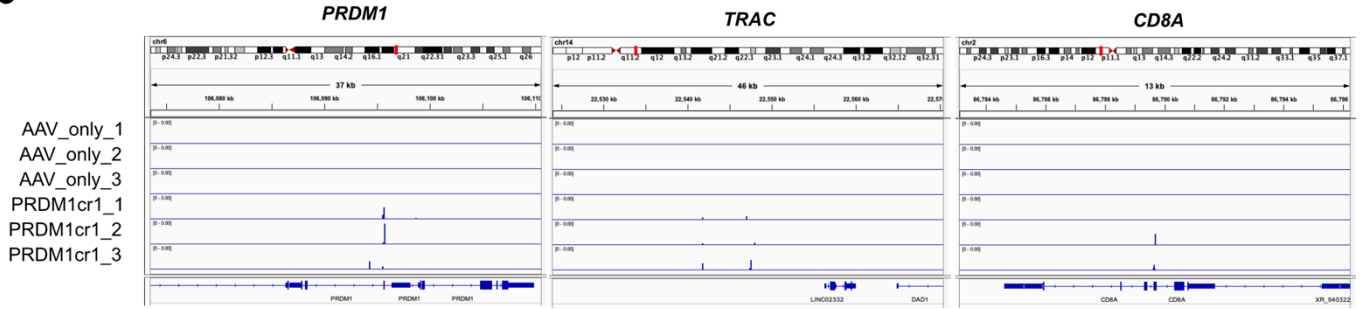

267

268 **Supplementary Figure 13: Additional visualization of CLASH-PRDM1-cr1 CAR-T's genome-wide**  
 269 **AAV-integration**

270 **a**, IGV visualization of CLASH-PRDM1 off-target integration events throughout the human genome. Peaks  
 271 represent normalized off-target integration reads with y-axes standardized across samples and no  
 272 windowing function.

273 **b**, IGV visualization of CLASH-PRDM1 off-target integration events for specific genomic regions,  
 274 including PRDM1, TRAC and CD8A. Peaks represent normalized off-target integration reads with y-axes  
 275 standardized across samples and no windowing function.

276

277 **Supplementary Datasets**

278

279 **Supplementary Dataset S1**

280 **CLASH library, *in vitro* and *in vivo* screening experiments and analyses**

281 A zip file of folders and files, including individual txt files below:

282

283 **S1.1\_Descartes\_Library\_Lists**

284 Descartes library gene list (initial, 954)

285 Descartes library gene list (final, 901)

286 Composition of the Descartes library (all crRNAs)

287 Details of Descarte library annotation (with genomic features and Deep scores)

288

289 **S1.2\_CD8\_invitro\_CLASH**

290 Sample metadata for CD8 *in vitro* CLASH

291 Descartes library representation for CD8 *in vitro* CLASH (processed read counts)

292 Bulk analysis for later time points of CD8 *in vitro* CLASH

293 SAMBA full time-course analysis of CD8 *in vitro* CLASH

294

295 **S1.3\_CD4\_invitro\_CLASH**

296 Sample metadata for CD4 *in vitro* CLASH

297 Descartes library representation for CD4 *in vitro* CLASH (processed read counts)

298 Bulk analysis for later time points of CD4 *in vitro* CLASH

299 SAMBA full time-course analysis of CD4 *in vitro* CLASH

300

301 **S1.4\_CD8\_invivo\_CLASH**

302 Sample metadata for CD8 *in vivo* CLASH in a tumor model

303 Descartes library representation for CD8 *in vivo* CLASH (processed read counts)

304 Bulk analysis for later time points of CD8 *in vivo* CLASH

305

306 **S1.5\_CD3\_invivo\_CLASH**

307 Sample metadata for CD3 *in vivo* CLASH in a tumor model

308 Descartes library representation for CD3 *in vivo* CLASH (processed read counts)

309 Bulk analysis for day 12 of CD3 *in vivo* CLASH

310

311 **Supplementary Dataset S2**

312 **All CLASH - MIPS processed data and correlation analyses, with metadata.**

313 An excel file, including individual tabs below:

314 Metadata of MIPS experiment

315 Coordinates for collapsed crRNA target region windows used for MIPS mapping.

316 MIPS library representation sample reads for crRNA target windows, log2 transformed.

317 Day 32 in vitro screen library representation for crRNA target windows, log2 transformed.

318 Day 54 in vitro screen library representation for crRNA target windows, log2 transformed.

319 Coarse filtering MIPS target capture variants for 56 crRNA pooled library sample MIPS-1.

320 Coarse filtering MIPS target capture variants for 56 crRNA pooled library sample MIPS-2.

321 Coarse filtering MIPS target capture variants for 56 crRNA pooled library sample MIPS-3.

322 Coarse filtering MIPS target capture variants for vector control pXD60-1.

323 Coarse filtering MIPS target capture variants for vector control pXD60-2.

324 Coarse filtering MIPS target capture variants for vector control pXD60-3.

325 Mean MIPS target capture variant frequencies and mean MIPS library abundance for crRNA target windows.

326 MIPS cutting efficiency normalized by library abundance for crRNA target windows compared to day 32  
327 screen library abundance by each individual replicate.

328 MIPS cutting efficiency for crRNA target windows by each individual replicate compared to day 32 screen  
329 library abundance averaged across replicates.

330 MIPS cutting efficiency for crRNA target windows averaged across replicates compared to day 32 screen  
331 library abundance by each individual replicate.

332

333 **Supplementary Dataset S3**

334 **All Nextera amplicon sequencing indel variant frequencies, with metadata.**

335 An excel file, including individual tabs below:

336 Metadata of Nextera-NGS experiments

337 Vcf format indels of *PRDMI*, various crRNAs and donors

338 Vcf format indels of *PRDMI*, various crRNAs and donors, respective controls

339

340 **Supplementary Dataset S4**

341 ***PRDMI*  $\Delta$ exon3 CD22 CAR-T time-course mRNA-seq.**

342 An excel file, including individual tabs below:

343 Sample metadata for CD22 CAR-T time-course mRNA-seq.  
344  $\Delta$ exon3 vs. Vector gene-level differential expression analysis on day 8.  
345  $\Delta$ exon3 vs. Vector gene-level differential expression analysis on day 19.  
346  $\Delta$ exon3 vs. Vector gene-level differential expression analysis on day 33.  
347 The maSigPro clustering analysis with Z-score normalized input.  
348 Cluster membership gene lists from maSigPro mRNA-seq time-course analysis.  
349 DAVID gene ontology analysis of day 33  $\Delta$ exon3 upregulated genes (adj. p < 0.001)  
350 DAVID gene ontology analysis of day 33  $\Delta$ exon3 downregulated genes (adj. p < 0.001)  
351 DAVID gene ontology analysis for cluster 1 genes from maSigPro  
352 DAVID gene ontology analysis for cluster 2 genes from maSigPro  
353 DAVID gene ontology analysis for cluster 3 genes from maSigPro  
354 DAVID gene ontology analysis for cluster 4 genes from maSigPro  
355 DAVID gene ontology analysis for cluster 5 genes from maSigPro  
356 DAVID gene ontology analysis for cluster 6 genes from maSigPro  
357 DAVID gene ontology analysis for cluster 7 genes from maSigPro  
358 DAVID gene ontology analysis for cluster 8 genes from maSigPro  
359 DAVID gene ontology analysis for cluster 9 genes from maSigPro

360

### 361 **Supplementary Dataset S5**

### 362 **Genome-wide chromatin binding of PRDM1 WT and exon3-skip mutant via Cut-n-Run in human** 363 **CD22 CAR-T cells.**

364 An excel file, for PRDM1 WT and  $\Delta$ exon3 mutant CAR-T Cut-n-Run, including individual tabs below :

365 Sample metadata of Cut-n-Run

366 Processed read counts of Cut-n-Run

367 Peak identification of Cut-n-Run

368 List of PRDM1 WT bound genes

369 List of PRDM1  $\Delta$ exon3 mutant bound genes

370 Overlap analysis of PRDM1 WT bound genes vs *PRDM1*  $\Delta$ exon3 differentially expressed genes

371 Overlap analysis of PRDM1 exon3-skip mutant bound genes vs *PRDM1*  $\Delta$ exon3 differentially expressed  
372 genes

373 Pathway analysis of PRDM1 WT bound genes and *PRDM1*  $\Delta$ exon3 upregulated genes

374 Pathway analysis of PRDM1 WT bound genes and *PRDM1*  $\Delta$ exon3 downregulated genes

375

376 **Supplementary Dataset S6**

377 **All genome-wide AAV on-target and off-target integration processed data, with metadata.**

378 An excel file, including individual tabs below:

379 Normalized reads and positions for off-target integration events for AAV only sample 1.

380 Normalized reads and positions for off-target integration events for AAV only sample 2.

381 Normalized reads and positions for off-target integration events for AAV only sample 3.

382 Normalized reads and positions for off-target integration events for PRDM1cr1 sample 1.

383 Normalized reads and positions for off-target integration events for PRDM1cr1 sample 2.

384 Normalized reads and positions for off-target integration events for PRDM1cr1 sample 3.

385 Total and gene-specific (*PRDM1*, *TRAC*, *CD8A*) off-target integration percentages.

386

387

388 **Table S1. Supplementary DNA oligonucleotide information**

389 Oligo sequences used in this study listed in an excel file.

390

391 **Supplementary source data and statistics**

392 Source data and statistics of non-NGS type data provided in an excel file.

393

394 Source data of uncropped blots images provided in a pdf file.

395

396

397
